# Supplementary figures and images for: Fabrication of Bilayer Coating of Poly(3,4-ethylenedioxythiophene)-Halloysite/Chitosan and Mg2+/Sr2+-Doped HAP on Titanium Alloy for Biomedical Implant Applications: Physicochemical and In Vitro Biological Performances Studies
Source: Hindawi journal article supplement (doi:10.1155/2018/9813827), 2018-09-18

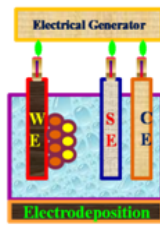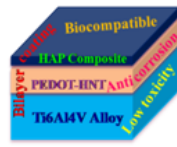

CS Ion Release

Mg, Sr Ion Release

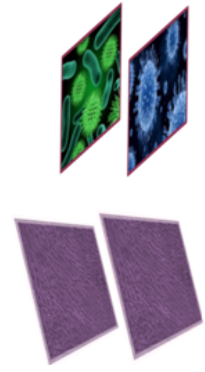

Supplement: f1 [file 9813827.f1.pdf]
